# Supplementary material for: A Lab-on-a-Chip Device Integrated DNA Extraction and Solid Phase PCR Array for the Genotyping of High-Risk HPV in Clinical Samples
Source: PubMed Central journal article supplement (PMC6722547; doi:10.3390/mi10080537), 2019-08-15
Supplement: micromachines-10-00537-s001.pdf [file micromachines-10-00537-s001.pdf]

# A Lab-on-a-Chip Device Integrated DNA Extraction and Solid Phase PCR Array for the Genotyping of High-Risk HPV in Clinical Samples

Cancan Zhu <sup>1,2</sup>, Anzhong Hu <sup>1</sup>, Junsheng Cui <sup>1</sup>, Ke Yang <sup>1</sup>, Xinchao Zhu <sup>1,2</sup>, Yong Liu <sup>1</sup>, Guoqing Deng <sup>1</sup> and Ling Zhu <sup>1,\*</sup>

<sup>1</sup> Institute of Applied Technology, Hefei Institutes of Physical Science, Chinese Academy of Sciences, 2221 Changjiang Road, Hefei 230000, China

<sup>2</sup> Science Island Branch, University of Science and Technology of China, No. 96, JinZhai Road Baohe District, Hefei 230000, China

\* Correspondence: zhul@aiofm.ac.cn Tel.: +86-0551-6539-2997

**Table 1.** List of primers and probes used in this study.

| Genotype | Primer sequence (5' - 3')                                                                                                    | Amplicon length |
|----------|------------------------------------------------------------------------------------------------------------------------------|-----------------|
| HPV 16   | F: TAGCAGCAACGAAGTATCCTCTCCT<br>R: CY5- GTGAGGATTGGAGCACTGTCCACTGAGTCTCT                                                     | 205 bp          |
|          | Solid-Probe: TTTTTTTTTTCCCCCCCCCAGCGACCAAGATCAG<br>AGCCAGACACC<br>GGAAACCCCTG                                                |                 |
| HPV 18   | F: TCCAACGACGCAGAGAAACAC<br>R: CY5- GGTCGGCTCGTCGGGCTGGT                                                                     | 204 bp          |
|          | Solid-Probe: TTTTTTTTTTCCCCCCCCCATTTGTATTGCATTTAG<br>AGCCCCAAAA<br>TGAAATTCCGG<br>F: GGGCGTCTGCAACTACTACTTCTACTTT<br>R: CY5- |                 |
| HPV 31   | CAGAAAATATGGGAATGTCAAAACCTGTACTTAGTGGC<br>R: CY5- TATAGGTGCAACGTTAGA ACTACACACAGTCCGCT                                       | 185 bp          |
|          | Solid-Probe: TTTTTTTTTTCCCCCCCCCACATTTATGCAGACAC<br>TGATTTTACTGT<br>GGATACACCTG<br>F: CACAGACACCGGCCAGCCCCT                  |                 |
| HPV 33   | R: CY5- TATAGGTGCAACGTTAGA ACTACACACAGTCCGCT                                                                                 | 130 bp          |
|          | Solid-Probe: TTTTTTTTTTCCCCCCCCCGGCCAGCCCCTTACAA<br>AGCTGTTCTGTG<br>CAGACCCC<br>F: TGGAAACTGAGCAGATGGCAC                     |                 |
| HPV 58   | R: CY5- GGTC TAACTAATTCCATAAAAACITACTCCATAAGCT                                                                               | 234 bp          |
|          | Solid-Probe: TTTTTTTTTTCCCCCCCCCGTTCCATTACAAAATA<br>TTAGTAATATTTT<br>ACATAACAGT                                              |                 |

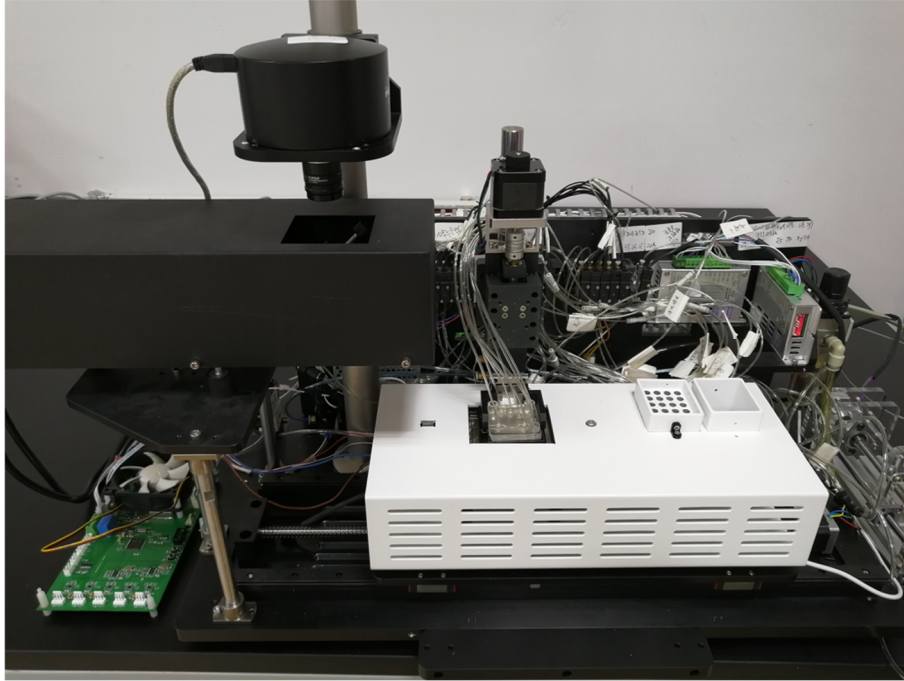

**Figure S1:** The platform combined a thermoelectric unit, a fluorescence-detecting system and fluid drive control unit for high-risk HPV genotyping.

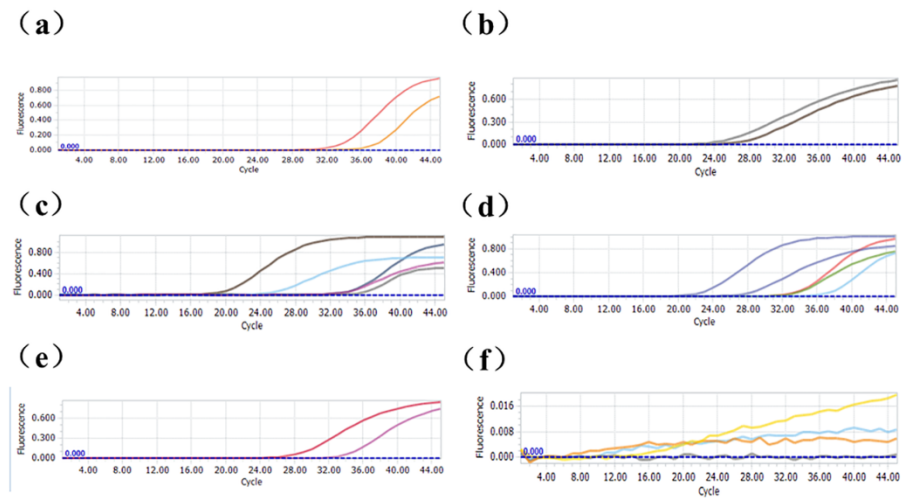

**Figure S2:** The result of twenty clinical samples analyzed on Roche MagNA Pure 24 for DNA extraction and Roche LightCycler 96 for real-time PCR. (a) Sample 1 and Sample 2 were HPV16 genotype; (b) Sample 3 and Sample 4 were HPV18 genotype; (c) Samples 5–9 were HPV31 genotype; (d) Samples 10–14 were HPV33 genotype; (e) Samples 15, 16 were HPV58 genotype; (f) Samples 17–20 were negative.
